# Supplementary material
Source: publisher figshare collection journal article supplement (https://springernature.figshare.com/ndownloader/files/18045938)
Supplement: Supplementary file [file 18045938]

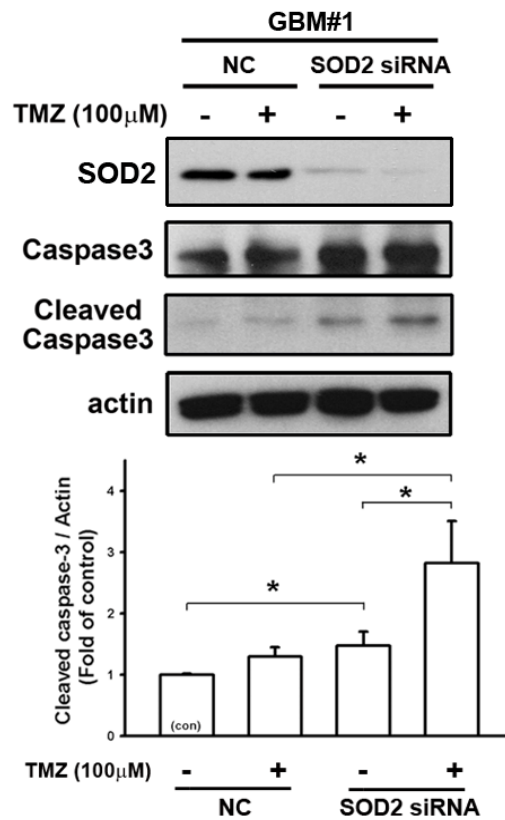

**Additional file 4: Figure S4.** The resistant primary cells (GBM#1) were pretreated with siRNA for SOD2 knockdown. The cells were then incubated in low serum (2%) cultures medium with or without TMZ. The western blotting result of cleaved caspase 3 after TMZ treatment was shown. (n=3 for each group, Data are presented as mean  $\pm$  standard error, \*P<0.05)
